# Supplementary material for: Transfer learning based on atomic feature extraction for the prediction of experimental 13 C chemical shifts
Source: Royal Society of Chemistry journal article supplement (doi:10.1039/d4dd00168k), 2024-01-01
Supplement: d4dd00168k1.pdf [file d4dd00168k1.pdf]

## 9 Contents

|    |          |                                                      |           |
|----|----------|------------------------------------------------------|-----------|
| 10 | <b>1</b> | <b>Atom order distortion between Exp5K and DFT8K</b> | <b>3</b>  |
| 11 | <b>2</b> | <b>Architectures</b>                                 | <b>4</b>  |
| 12 | <b>3</b> | <b>Modified train and test sets</b>                  | <b>6</b>  |
| 13 | <b>4</b> | <b>Training and hyperparameters</b>                  | <b>7</b>  |
| 14 | <b>5</b> | <b>Dataset summary</b>                               | <b>7</b>  |
| 15 | <b>6</b> | <b>Performance of the models</b>                     | <b>8</b>  |
| 16 | <b>7</b> | <b>Molecules where models break down</b>             | <b>12</b> |

# 1 Atom order distortion between Exp5K and DFT8K

Certain carbon atoms exhibit DFT shifts within the 0-10 ppm range. A detailed inspection of the *exp\_dft\_outlier* file reveals that the atom labels were altered, with these atoms being hydrogen atoms in the DFT8K dataset but carbon atoms in the NMR8K dataset. This label distortion likely occurred due to the addition of explicit hydrogen atoms in functional groups, where they were previously implicit, using the *AddHs* function of rdkit during data transformation.

Atoms in any chemical structure can be ordered uniquely, as in the SMILES canonization process. Consequently, there is also a unique mapping of two different atom labelings of the same chemical structure. Rdkit stores the mapping from any atom labeling to canonical labeling in the *\_smilesAtomOutputOrder* property of the canonicalized molecule. If we denote the mapping of the experimental structure as  $f$  and the DFT structure as  $g$ , then the mapping from experimental atom labels to DFT atom labels is  $g \circ f$ . Using this approach, we can correctly deduce MAE and RMSE of DFT predicted shift compared to experiments.

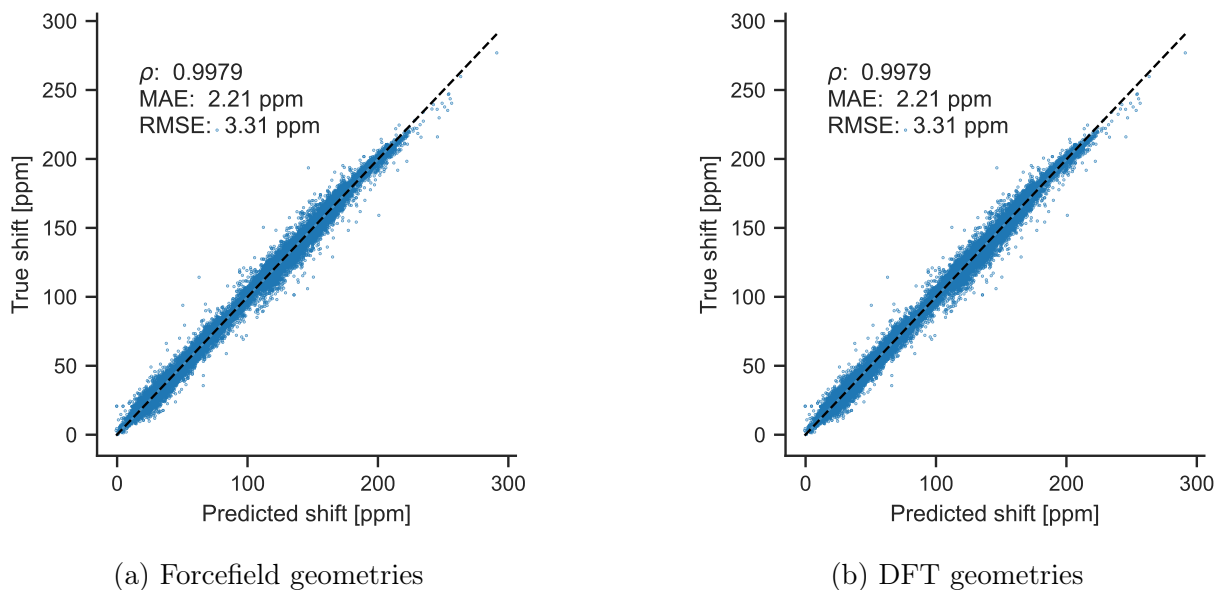

Figure 1: True against scaled DFT predicted chemical shifts of Exp5K dataset. More accurate DFT geometries don't result in better shift prediction

## 31 2 Architectures

Models architecture are shown in Figure 2 and 3. Dropout is applied after each layer.

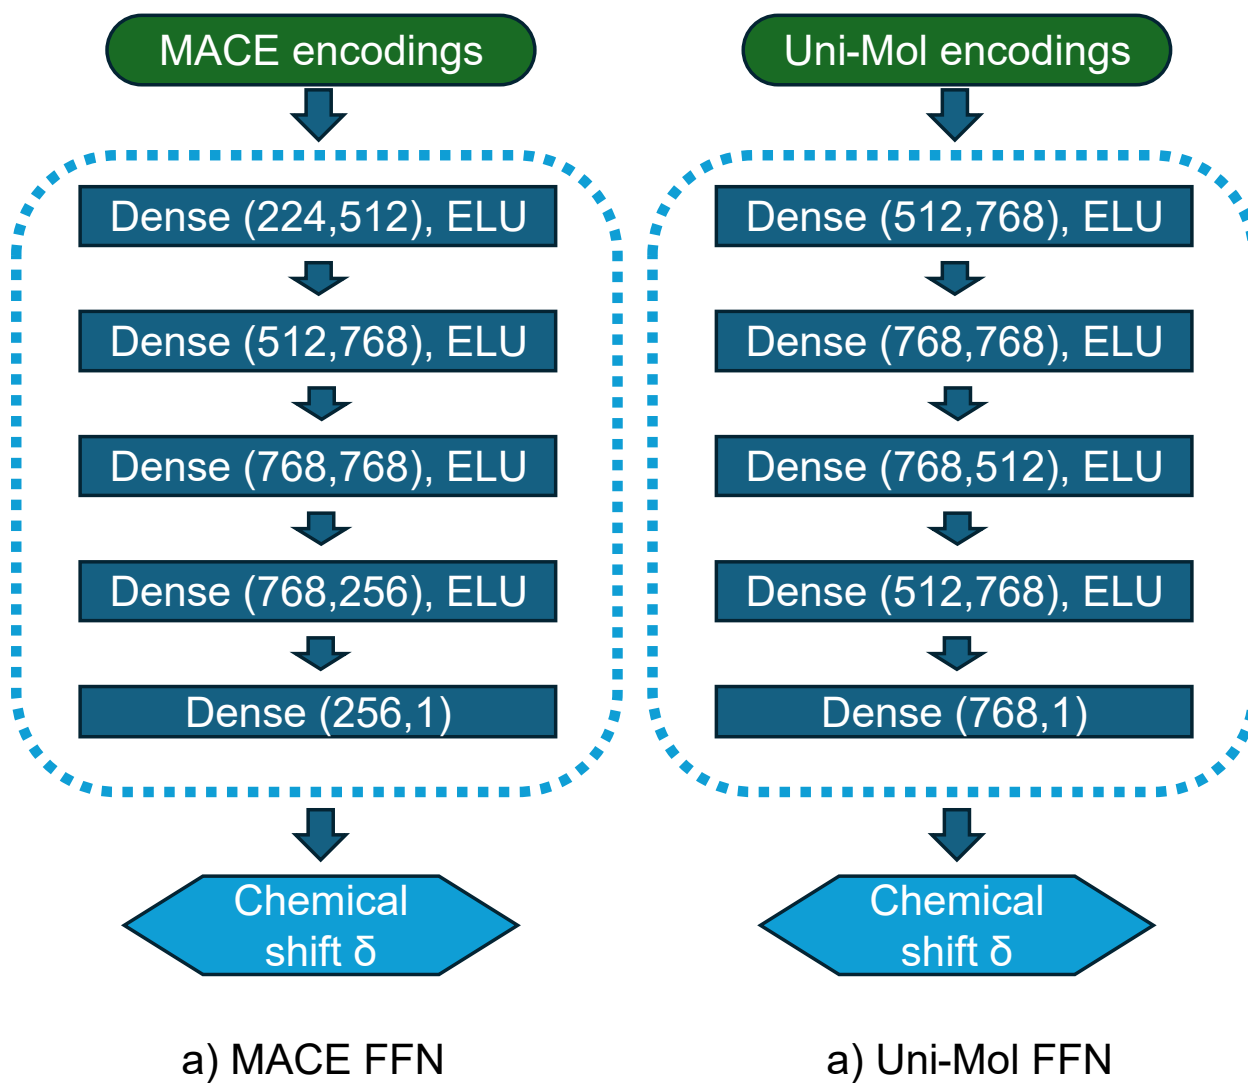

Figure 2: FFN models. Dropout layers are not shown. ELU = Exponential Linear Unit

32

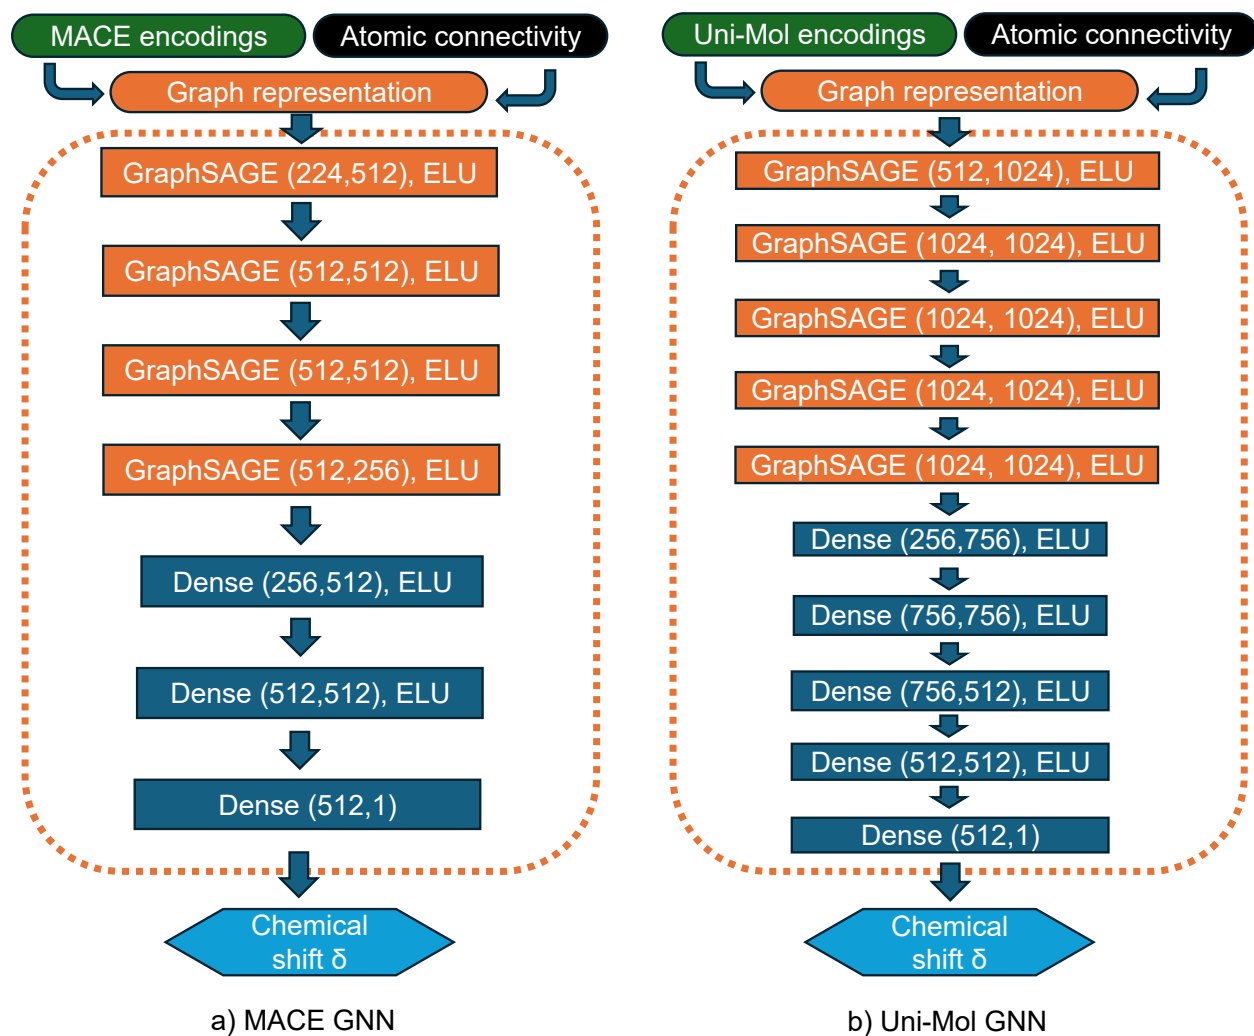

Figure 3: GNN models. Dropout layers are not shown. ELU = Exponential Linear Unit

### 33 3 Modified train and test sets

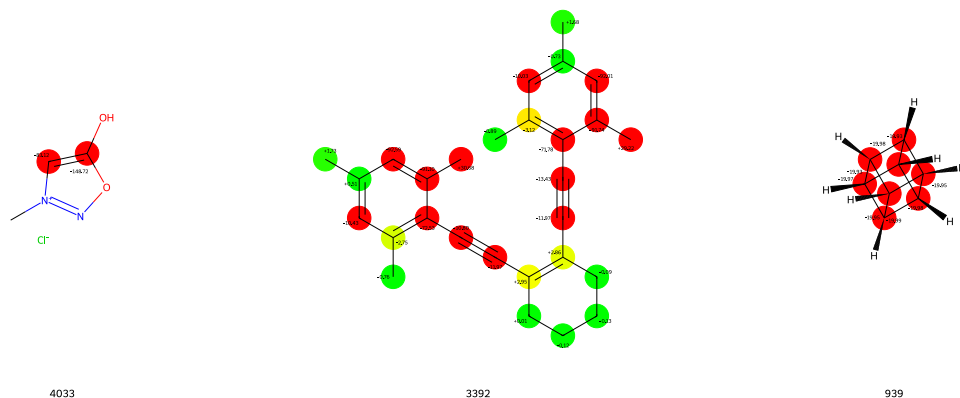

Figure 4: Molecules removed from the test set. The first molecule has the wrong graph connectivity(not shown), and the second molecule has the erroneous geometry with two methyl groups overlapping. The third molecule is removed only from the low-data regime test set due to erroneous behavior in MACE models when trained in low-data regimes, likely due to inaccurate geometry obtained from the forcefield.

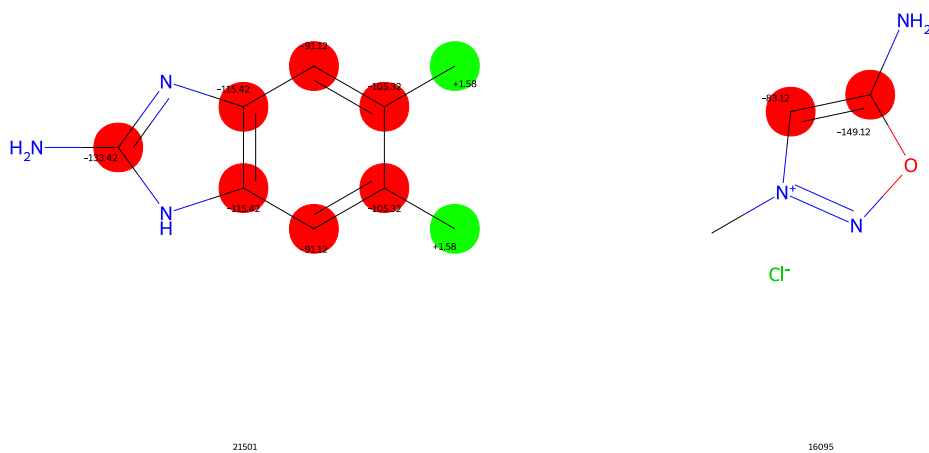

Figure 5: Molecules removed from the training set before sampling for low-data regimes. The first molecule has the wrong graph connectivity and lacks one hydrogen atom in the structure(not shown), while the second molecule has the wrong graph connectivity (not shown).

## 4 Training and hyperparameters

The hyperparameters for all models are listed in Table 1. A custom learning rate decay of 4% was applied every 15 epochs. The cost function was the mean absolute error. The AdamW optimizer, with a weight decay of 0.01, was used to minimize the cost function. A validation set comprising 10% of the training data was utilized. The train/validation split was done on molecule level. Once the optimal hyperparameters, including the number of epochs, were identified, the models were retrained from scratch using the entire training set.

Table 1: Hyperparameters and number of trainable parameters

| Model       | Initial LR | Batch size | Dropout rate | Epochs |
|-------------|------------|------------|--------------|--------|
| MACE FFN    | 6e-4       | 96         | 0.10         | 1000   |
| Uni-Mol FFN | 8e-6       | 96         | 0.15         | 900    |
| MACE GNN    | 1e-3       | 48         | 0.1          | 1000   |
| Uni-Mol GNN | 6e-4       | 64         | 0.15         | 900    |

41

## 5 Dataset summary

Table 2: Data Description of training and test data

| Dataset | N° spectra | N° atoms |       | N° C atoms |       | N° labeled at. |       | N° heavy at. |       |
|---------|------------|----------|-------|------------|-------|----------------|-------|--------------|-------|
|         |            | average  | range | average    | range | average        | range | average      | range |
| train   | 21509      | 26.96    | 3-64  | 10.68      | 1-34  | 9.93           | 1-34  | 14.20        | 1-44  |
| test    | 5386       | 26.74    | 5-64  | 10.62      | 1-33  | 9.88           | 1-32  | 14.14        | 2-38  |

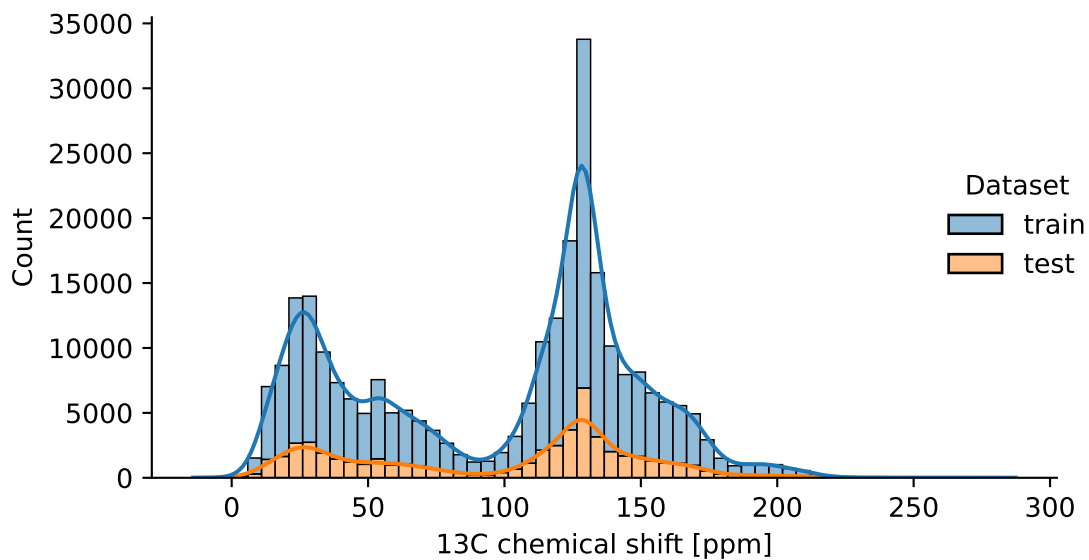

Figure 6: Distribution of chemical shifts

## 6 Performance of the models

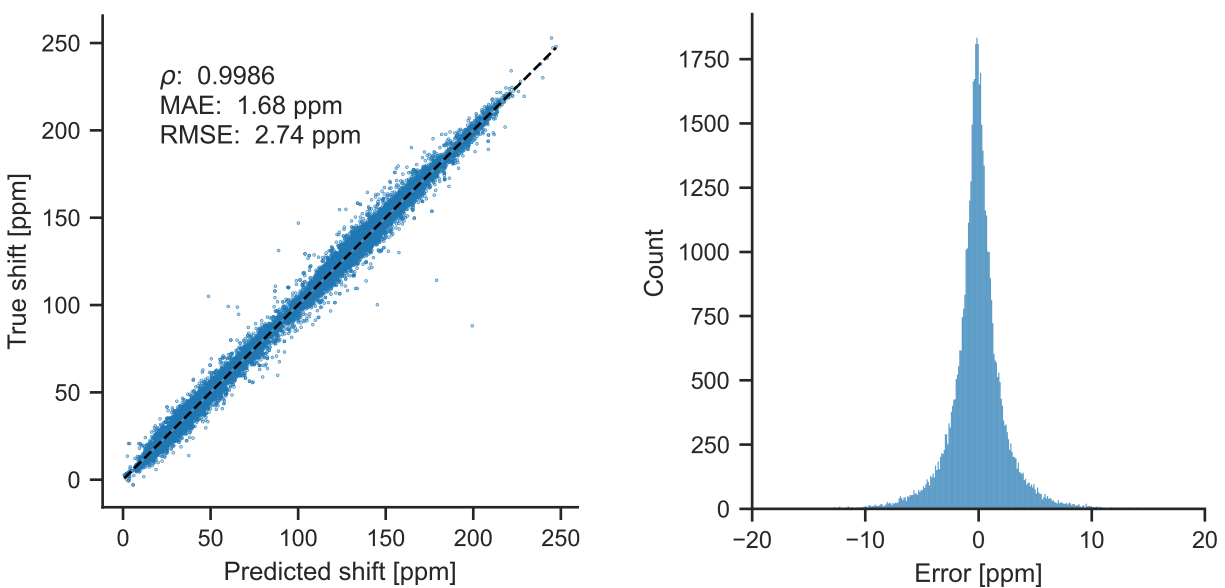

Figure 7: MACE FFN



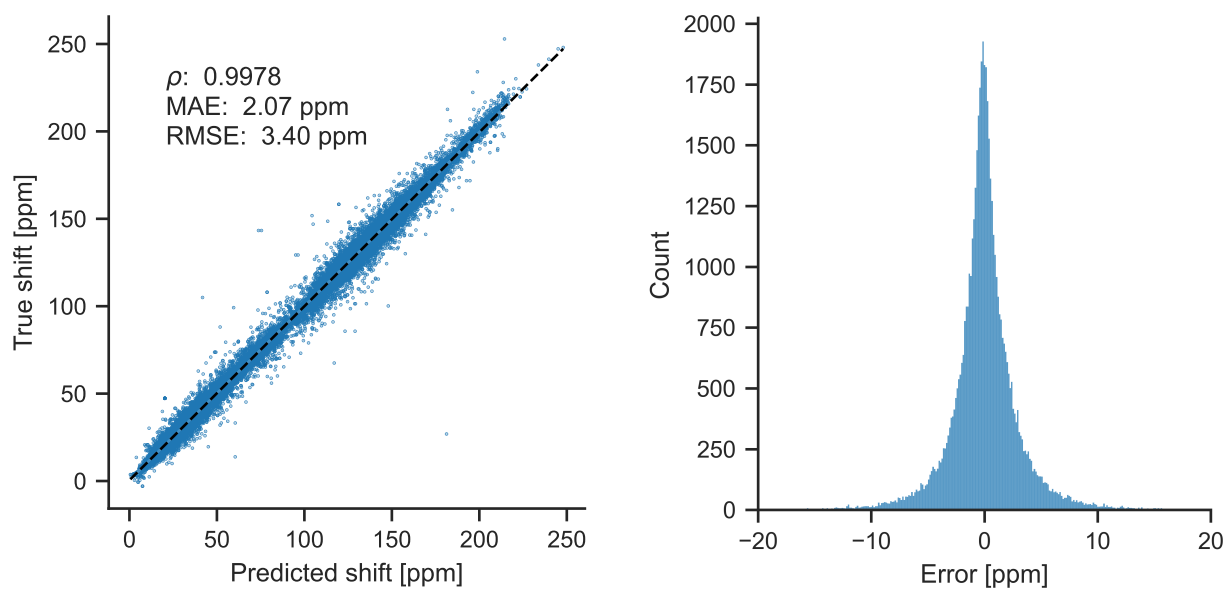

Figure 7: Uni-Mol FFN

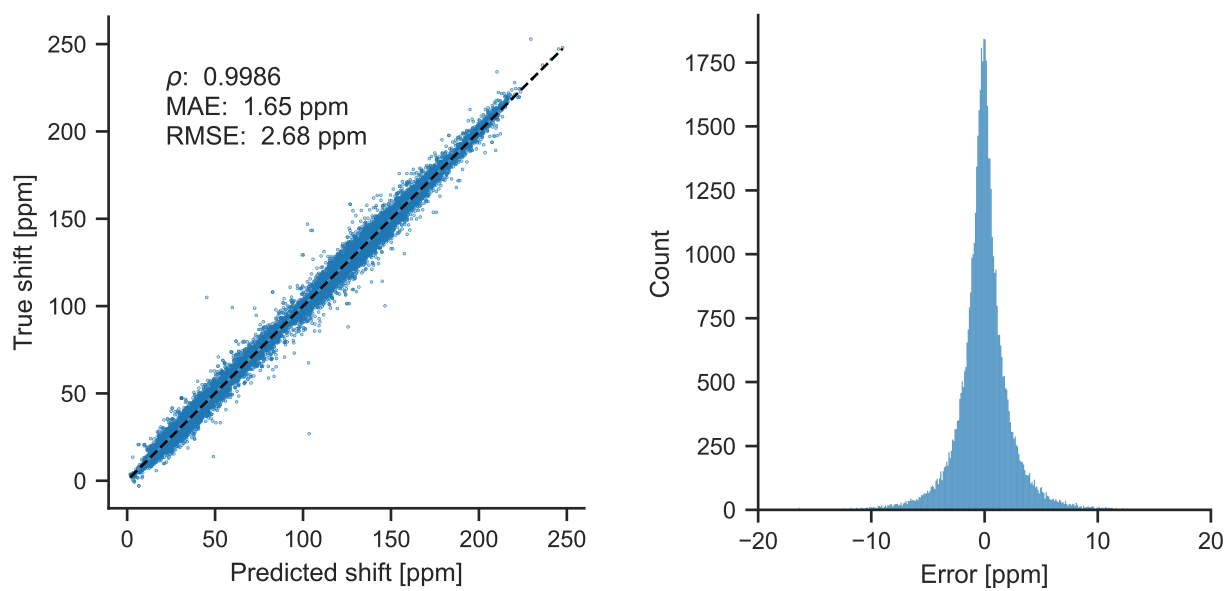

Figure 8: Ensemble MACE & Uni-Mol FFN

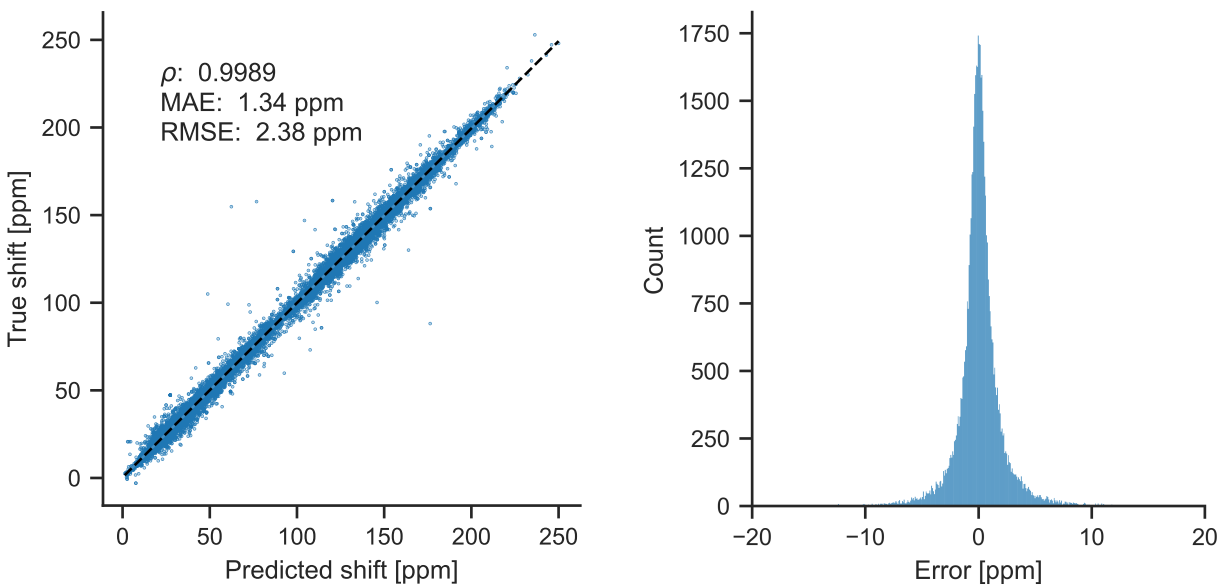

Figure 8: MACE GNN

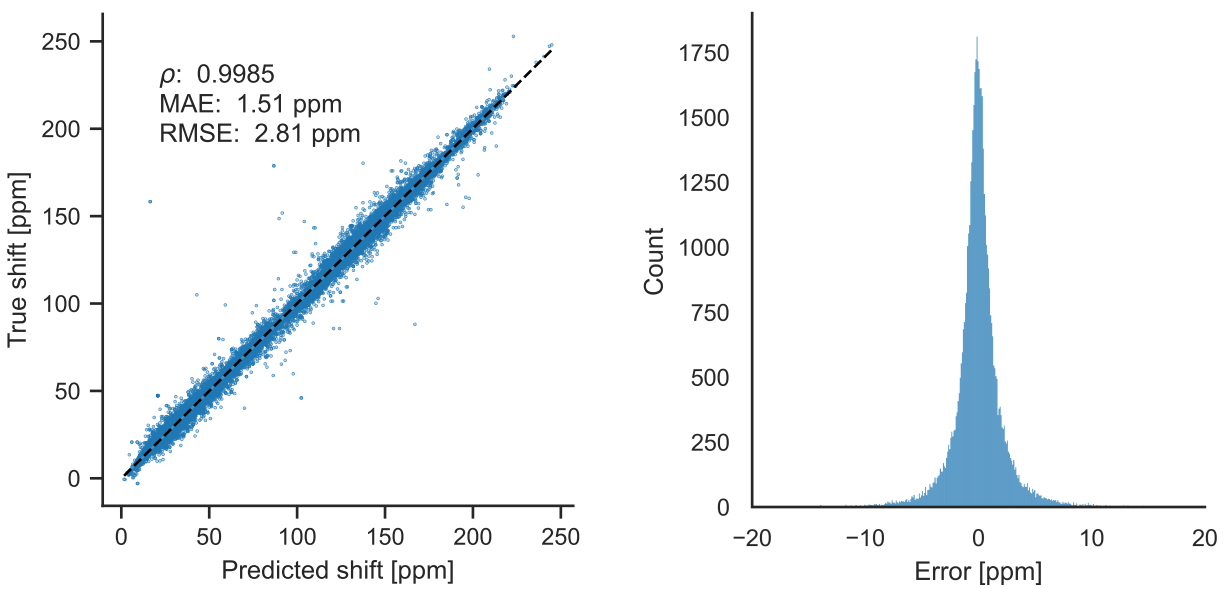

Figure 9: Uni-Mol GNN

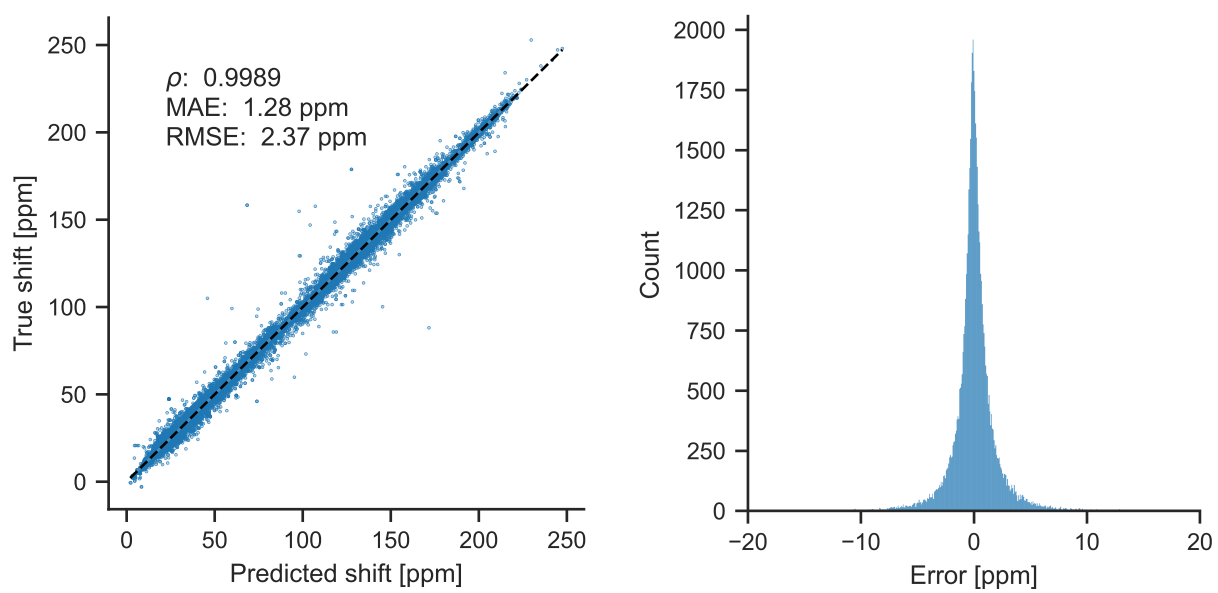

Figure 9: Ensemble MACE & Uni-Mol GNN

## 44 7 Molecules where models break down

45 For simplicity, we only show molecules where Ensemble MACE & Uni-Mol GNN and MACE  
46 GNN models fail. However, the code to produce similar plots for other models is available  
47 in the repository of this paper. The magnitude of errors is denoted by color: atoms with  
48 errors smaller than 1.5 ppm are green, while atoms with errors larger than 4.5 ppm are red.  
Errors in between are colored using linear interpolation.

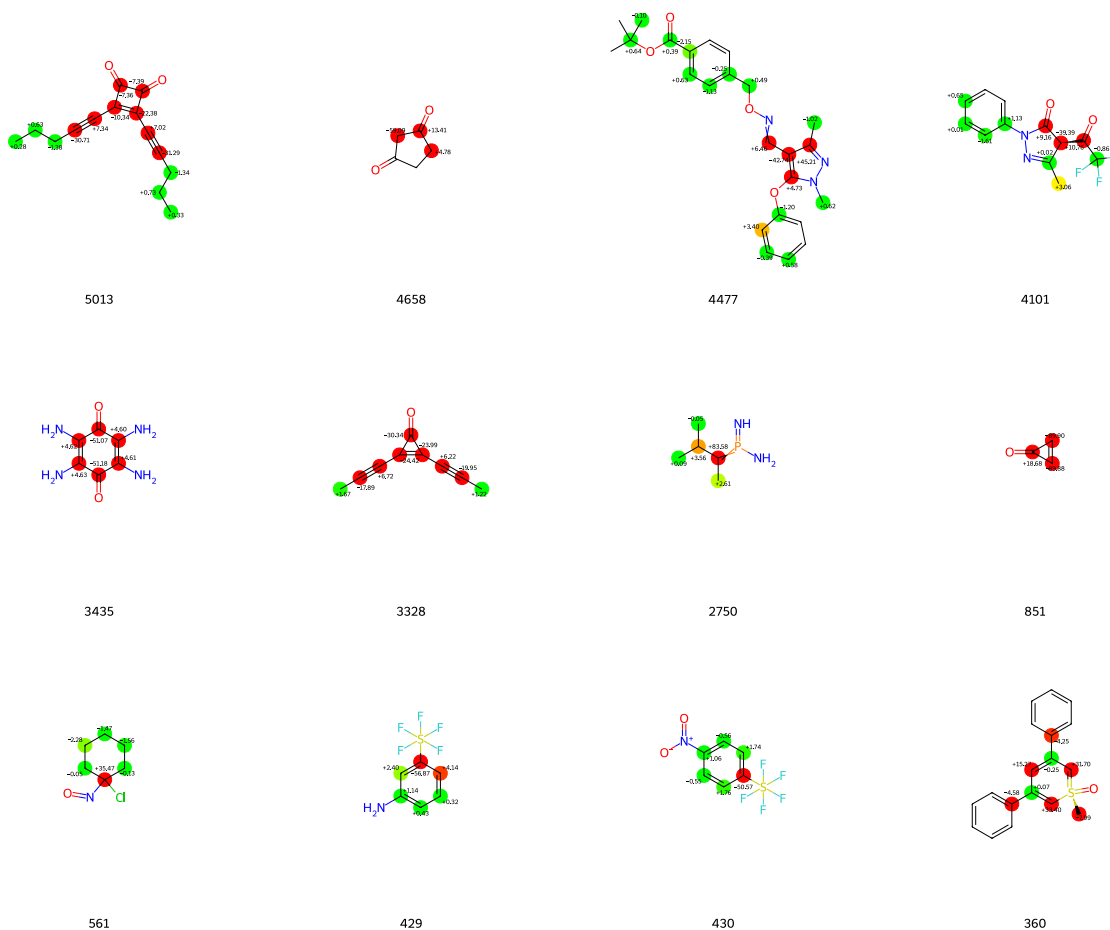

Figure 10: Molecules where Ensemble MACE & Uni-Mol GNN predicts at least one shift with absolute error larger than 30 ppm.

49

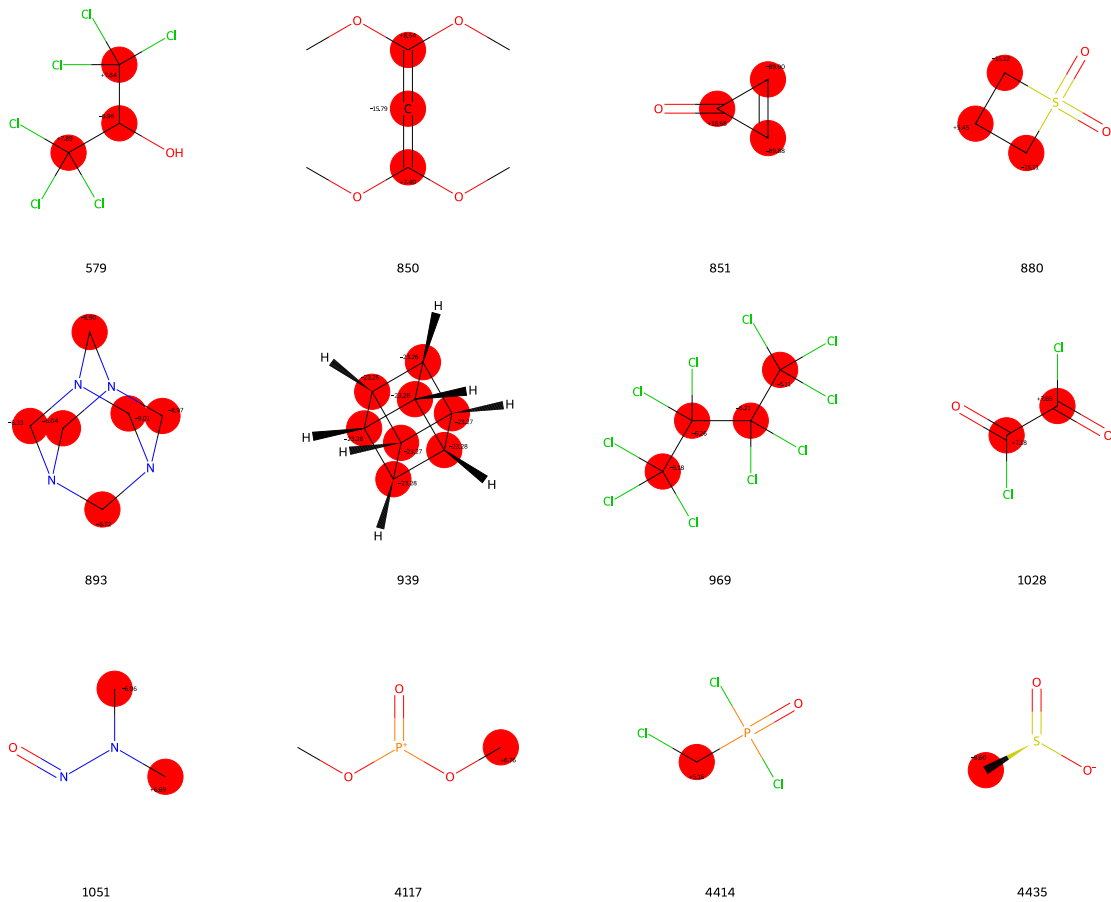

Figure 11: Molecules where Ensemble MACE & Uni-Mol GNN predicts all shifts with the absolute error larger than 5 ppm.

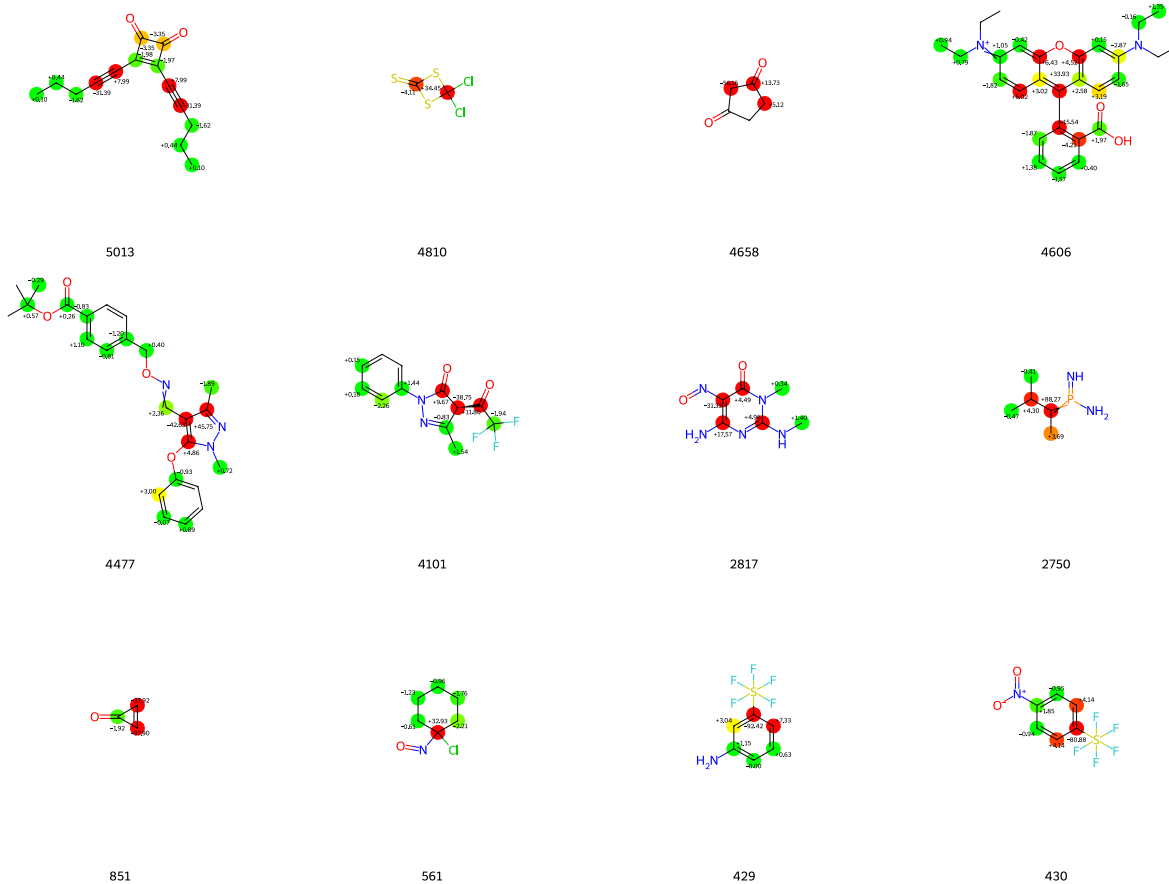

Figure 12: Molecules where MACE GNN predicts at least one shift with absolute error larger than 30 ppm.

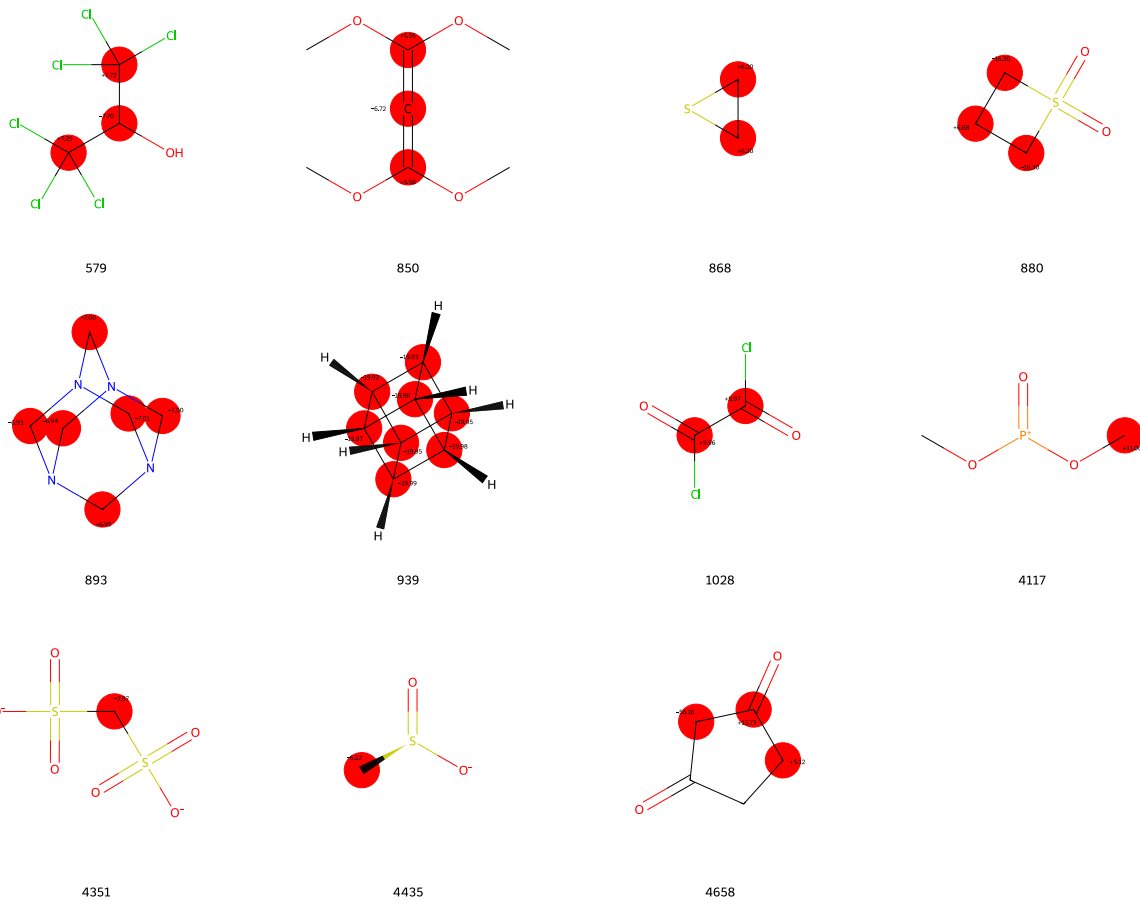

Figure 13: Molecules where MACE GNN predicts all shifts with the absolute error larger than 5 ppm.
